# Supplementary material for: The importance of glacier and forest change in hydrological climate-impact studies
Source: Copernicus journal article supplement (doi:10.5194/hess-17-619-2013), 2013-02-11
Supplement: Supplementary file 1 [file tables_s1a_b_suppl_matrl_koeplin_et_al_2012_hess_v2.docx]

**Table S1 a)**. Relative seasonal change of potential evapotranspiration *ETP* in the climate scenario in percent for every study catchment. The percent changes are calculated relative to the respective control period value which is 100 %. Bold numbers indicate ensemble mean values. The range of projected changes from minimum to maximum is given in brackets (italics). For the corresponding absolute values please confer supplementary Fig. S1.

| **Catchment name (No.)** | **Elevation [m a.s.l.]** | ***ETP* change DJF [%]** | ***ETP* change MAM [%]** | ***ETP* change JJA [%]** | ***ETP* change SON [%]** |
| --- | --- | --- | --- | --- | --- |
| Sitter (3) | 945 | **93** (*55–113*) | **21** (*14–27*) | **8** (*4–13*) | **14** (*8–18*) |
| Emme (1) | 976 | **95** (*58–118*) | **21** (*15–28*) | **3** (*-3–9*) | **11** (*3–17*) |
| Thur (2) | 1105 | **134** (*76–168*) | **25** (*17–33*) | **8** (*3–12*) | **16** (*10–22*) |
| La Jogne (5) | 1407 | **100** (*64–130*) | **26** (*17–35*) | **3** (*-2–10*) | **15** (*8–20*) |
| Grand Eau (4) | 1551 | **81** (*50–107*) | **31** (*19–42*) | **5** (*0–13*) | **16** (*8–21*) |
| Simme (6) | 1652 | **124** (*76–170*) | **39** (*23–52*) | **15** (*9–21*) | **23** (*13–32*) |
| Ticino (14) | 1705 | **66** (*44–94*) | **25** (*11–36*) | **14** (*8–21*) | **23** (*11–34*) |
| Bavona (13) | 1943 | **76** (*51–111*) | **46** (*25–64*) | **25** (*20–31*) | **26** (*15–38*) |
| Landquart (15) | 2015 | **92** (*57–122*) | **41** (*28–54*) | **24** (*18–31*) | **32** (*17–45*) |
| Glenner (11) | 2016 | **64** (*42–87*) | **36** (*18–46*) | **20** (*14–28*) | **26** (*12–37*) |
| Vorderrhein (10) | 2148 | **62** (*37–88*) | **41** (*18–57*) | **30** (*25–38*) | **31** (*17–44*) |
| Aare (9) | 2162 | **53** (*33–75*) | **38** (*21–49*) | **40** (*26–52*) | **43** (*25–64*) |
| Mera (12) | 2335 | **56** (*34–86*) | **55** (*19–74*) | **34** (*25–42*) | **39** (*24–54*) |
| La Dixence (7) | 2501 | **52** (*30–74*) | **28** (*11–50*) | **45** (*27–61*) | **55** (*35–75*) |
| Wysswasser (8) | 2682 | **40** (*27–58*) | **34** (*16–46*) | **49** (*19–68*) | **50** (*23–84*) |

**Table S1 b)**. Same as Table S1 a) but for actual evapotranspiration *ETA*.

| **Catchment name (No.)** | **Elevation [m a.s.l.]** | ***ETA* change DJF [%]** | ***ETA* change MAM [%]** | ***ETA* change JJA [%]** | ***ETA* change SON [%]** |
| --- | --- | --- | --- | --- | --- |
| Sitter (3) | 945 | **93** (*55–113*) | **21** (*14–27*) | **7** (*3–12*) | **13** (*7–18*) |
| Emme (1) | 976 | **94** (*58–118*) | **21** (*15–28*) | **2** (*-4–8*) | **11** (*3–17*) |
| Thur (2) | 1105 | **133** (*75–166*) | **25** (*16–32*) | **6** (*2–11*) | **16** (*9–21*) |
| La Jogne (5) | 1407 | **97** (*63–125*) | **23** (*15–31*) | **0** (*-7–7*) | **14** (*7–19*) |
| Grand Eau (4) | 1551 | **77** (*48–101*) | **26** (*16–34*) | **-2** (*-8–6*) | **14** (*5–19*) |
| Simme (6) | 1652 | **120** (*74–163*) | **35** (*21–46*) | **7** (*2–12*) | **19** (*9–26*) |
| Ticino (14) | 1705 | **58** (*39–80*) | **16** (*7–22*) | **-5** (*-15–2*) | **18** (*6–29*) |
| Bavona (13) | 1943 | **45** (*32–64*) | **15** (*8–22*) | **-10** (-*19–-2*) | **19** (*7–30*) |
| Landquart (15) | 2015 | **84** (*53–110*) | **34** (*25–42*) | **8** (*3–13*) | **26** (*13–36*) |
| Glenner (11) | 2016 | **59** (*39–79*) | **29** (*15–38*) | **2** (*-7–10*) | **21** (*7–31*) |
| Vorderrhein (10) | 2148 | **46** (*29–64*) | **28** (*13–38*) | **2** (*-5–8*) | **24** (*10–35*) |
| Aare (9) | 2162 | **49** (*32–67*) | **31** (*18–41*) | **10** (*4–16*) | **18** (*8–28*) |
| Mera (12) | 2335 | **36** (*23–52*) | **29** (*9–39*) | **3** (*-4–8*) | **31** (*15–45*) |
| La Dixence (7) | 2501 | **45** (*28–63*) | **24** (*10–43*) | **8** (*-6–17*) | **23** (*11–34*) |
| Wysswasser (8) | 2682 | **38** (*26–54*) | **27** (*12–38*) | **25** (*8–37*) | **18** (*8–28*) |
